# Supplementary material
Source: publisher figshare collection journal article supplement (https://sage.figshare.com/ndownloader/files/36009485)
Supplement: Supplementary file 1 [file 36009485]

|  | | | **Males** | | |
| --- | --- | --- | --- | --- | --- |
| **Measurement** | **Interval** | **Statistic** | **Cambodian** | **Chinese** | **Vietnamese** |
| Aspartate Aminotransferase Activity  (U/L) | Pretreatment | Mean (95% CI) | 46.5 (43.8-49.7) | 49.3 (47.8-50.9) | 46.3 (43.8-49.3) |
| SD | 25.51 | 20.60 | 15.57 |
| N | 282 | 716 | 117 |
| Median | 41 | 44 | 44 |
| Central 95% | 25-105 | 26-105 | 23-97 |
| Final | Mean (95% CI) | 53.4 (49.5-58.5) | 48.6 (47.3-50.0) | 52.0 (47.9-56.6) |
| SD | 39.28 | 19.71 | 24.25 |
| N | 282 | 732 | 117 |
| Median | 46 | 44 | 46 |
| Central 95% | 29-115 | 26-105 | 28-135 |
| Alanine Aminotransferase Activity  (U/L) | Pretreatment | Mean (95% CI) | 46.2 (44.3-48.2) | 49.3 (48.0-50.9) | 46.7 (43.4-50.4) |
| SD | 17.68 | 19.39 | 19.47 |
| N | 282 | 716 | 117 |
| Median | 44 | 45 | 42 |
| Central 95% | 21-87 | 24-101 | 22-106 |
| Final | Mean (95% CI) | 52.2 (50.3-54.5) | 49.2 (47.9-50.6) | 52.1 (47.6-56.8) |
| SD | 17.89 | 18.96 | 25.05 |
| N | 282 | 732 | 117 |
| Median | 49 | 45 | 47 |
| Central 95% | 25-101 | 24-98 | 25-122 |
| Alkaline Phosphatase Activity  (U/L) | Pretreatment | Mean (95% CI) | 630.5a,b (612.2-651.5) | 569.8a,c (556.8-582.4) | 511.1b,c (486.0-536.8) |
| SD | 166.56 | 181.91 | 145.05 |
| N | 282 | 716 | 117 |
| Median | 615 | 547 | 485 |
| Central 95% | 359-992 | 274-970 | 272-863 |
| Final | Mean (95% CI) | 652.3a,b (631.2-674.2) | 599.4a (587.0-613.0) | 587.3b (554.0-629.1) |
| SD | 183.37 | 185.94 | 221.41 |
| N | 282 | 732 | 117 |
| Median | 630 | 580 | 547 |
| Central 95% | 387-1096 | 308-1026 | 306-980 |
| Gamma-Glutamyltransferase Activity  (U/L) | Pretreatment | Mean (95% CI) | 80.5a,b (77.8-83.3) | 74.3a (72.7-76.0) | 71.3b (67.0-75.2) |
| SD | 23.43 | 21.72 | 21.62 |
| N | 276 | 716 | 117 |
| Median | 79 | 71 | 70 |
| Central 95% | 43-138 | 38-125 | 36-121 |
| Final | Mean (95% CI) | 80.8 (78.1-83.9) | 77.0 (75.3-78.7) | 74.8 (70.9-78.9) |
| SD | 24.82 | 23.42 | 22.39 |
| N | 276 | 732 | 117 |
| Median | 79 | 75 | 73 |
| Central 95% | 38-133 | 38-128 | 36-122 |
| Creatine Kinase Activity  (U/L) | Pretreatment | Mean (95% CI) | 834.1 (609.8-1121.0) | 688.7 (560.4-820.6) | 380.5 (280.1-500.1) |
| SD | 1207.14 | 912.12 | 317.44 |
| N | 89 | 192 | 30 |
| Median | 327 | 269 | 271 |
| Central 95% | 92-4524 | 99-3313 | 85-1347 |
| Final | Mean (95% CI) | 862.3 (551.0-1228.1) | 536.5 (447.5-642.6) | 736.9 (344.3-1233.7) |
| SD | 1818.88 | 697.11 | 1298.72 |
| N | 95 | 189 | 30 |
| Median | 288 | 267 | 250 |
| Central 95% | 116-5314 | 102-2615 | 94-5464 |
| Total Bilirubin Concentration (mg/dL) | Pretreatment | Mean (95% CI) | 0.22 (0.22-0.23) | 0.22 (0.22-0.23) | 0.21 (0.20-0.23) |
| SD | 0.074 | 0.069 | 0.077 |
| N | 282 | 716 | 117 |
| Median | 0.2 | 0.2 | 0.2 |
| Central 95% | 0.1-0.4 | 0.1-0.4 | 0.1-0.5 |
| Final | Mean (95% CI) | 0.22 (0.21-0.23) | 0.21 (0.20-0.21) | 0.21 (0.19-0.22) |
| SD | 0.083 | 0.066 | 0.061 |
| N | 282 | 732 | 117 |
| Median | 0.2 | 0.2 | 0.2 |
| Central 95% | 0.1-0.4 | 0.1-0.3 | 0.1-0.3 |
| Urea Nitrogen Concentration (mg/dL) | Pretreatment | Mean (95% CI) | 23.5 (23.0-23.9) | 23.1 (22.8-23.4) | 22.7 (22.0-23.5) |
| SD | 3.88 | 3.82 | 4.04 |
| N | 282 | 716 | 117 |
| Median | 23 | 23 | 22 |
| Central 95% | 17-31 | 17-31 | 15-33 |
| Final | Mean (95% CI) | 22.8b (22.3-23.3) | 23.0c (22.7-23.3) | 21.5b,c (20.8-22.2) |
| SD | 4.20 | 4.09 | 3.98 |
| N | 282 | 732 | 117 |
| Median | 22 | 23 | 21 |
| Central 95% | 16-31 | 16-32 | 12-30 |
| Creatinine Concentration  (mg/dL) | Pretreatment | Mean (95% CI) | 0.70 (0.69-0.71) | 0.70 (0.69-0.71) | 0.70 (0.68-0.72) |
| SD | 0.112 | 0.121 | 0.120 |
| N | 282 | 716 | 117 |
| Median | 0.7 | 0.7 | 0.7 |
| Central 95% | 0.5-0.9 | 0.5-0.9 | 0.5-1.0 |
| Final | Mean (95% CI) | 0.68 (0.67-0.70) | 0.68 (0.67-0.69) | 0.67 (0.65-0.68) |
| SD | 0.117 | 0.123 | 0.102 |
| N | 282 | 732 | 117 |
| Median | 0.7 | 0.7 | 0.7 |
| Central 95% | 0.5-0.9 | 0.5-0.9 | 0.5-0.9 |
| Sodium Concentration  (mEq/L) | Pretreatment | Mean (95% CI) | 149.1a,b (148.8-149.5) | 148.4a (148.2-148.6) | 148.2b (147.7-148.8) |
| SD | 3.18 | 3.13 | 3.12 |
| N | 282 | 716 | 117 |
| Median | 149 | 148 | 148 |
| Central 95% | 144-157 | 143-156 | 143-155 |
| Final | Mean (95% CI) | 147.6a,b (147.3-148.0) | 147.1a (146.9-147.3) | 146.6b (146.1-147.1) |
| SD | 2.86 | 2.80 | 2.72 |
| N | 282 | 732 | 117 |
| Median | 148 | 147 | 146 |
| Central 95% | 143-155 | 142-153 | 142-154 |
| Potassium Concentration  (mEq/L) | Pretreatment | Mean (95% CI) | 4.76 (4.69-4.83) | 4.81 (4.77-4.85) | 4.91 (4.80-5.01) |
| SD | 0.566 | 0.585 | 0.558 |
| N | 282 | 716 | 117 |
| Median | 4.7 | 4.7 | 4.8 |
| Central 95% | 3.8-6.0 | 3.9-6.2 | 3.9-6.0 |
| Final | Mean (95% CI) | 4.83 (4.76-4.89) | 4.84 (4.80-4.88) | 4.89 (4.79-4.99) |
| SD | 0.552 | 0.539 | 0.582 |
| N | 282 | 732 | 117 |
| Median | 4.8 | 4.8 | 4.8 |
| Central 95% | 4.0-6.2 | 3.9-6.0 | 3.7-6.2 |
| Chloride Concentration  (mEq/L) | Pretreatment | Mean (95% CI) | 107.2 (106.9-107.5) | 107.2 (107.0-107.4) | 106.9 (106.5-107.4) |
| SD | 2.56 | 2.78 | 2.42 |
| N | 282 | 716 | 117 |
| Median | 107 | 107 | 107 |
| Central 95% | 103-112 | 102-113 | 102-112 |
| Final | Mean (95% CI) | 107.0 (106.7-107.3) | 106.8 (106.6-107.0) | 106.9 (106.5-107.3) |
| SD | 2.49 | 2.55 | 2.47 |
| N | 282 | 732 | 117 |
| Median | 107 | 107 | 107 |
| Central 95% | 103-112 | 102-112 | 102-112 |
| Calcium Concentration  (mg/dL) | Pretreatment | Mean (95% CI) | 10.40a (10.34-10.45) | 10.26a,c (10.22-10.30) | 10.42c (10.33-10.51) |
| SD | 0.466 | 0.505 | 0.484 |
| N | 282 | 716 | 117 |
| Median | 10.4 | 10.2 | 10.4 |
| Central 95% | 9.6-11.3 | 9.3-11.3 | 9.6-11.6 |
| Final | Mean (95% CI) | 10.29a,b (10.23-10.34) | 10.20a (10.17-10.23) | 10.16b (10.08-10.23) |
| SD | 0.450 | 0.454 | 0.444 |
| N | 282 | 732 | 117 |
| Median | 10.3 | 10.2 | 10.2 |
| Central 95% | 9.5-11.2 | 9.3-11.1 | 9.1-11.0 |
| Phosphorous Concentration (mg/dL) | Pretreatment | Mean (95% CI) | 6.52a,b (6.38-6.67) | 6.10a,c (6.02-6.18) | 5.83b,c (5.61-6.04) |
| SD | 1.182 | 1.144 | 1.134 |
| N | 282 | 716 | 117 |
| Median | 6.5 | 6.1 | 6.0 |
| Central 95% | 4.2-8.5 | 3.7-8.3 | 3.7-8.1 |
| Final | Mean (95% CI) | 6.36 (6.24-6.48) | 6.27 (6.19-6.35) | 6.32 (6.16-6.50) |
| SD | 0.996 | 1.066 | 0.944 |
| N | 282 | 732 | 117 |
| Median | 6.3 | 6.3 | 6.2 |
| Central 95% | 4.4-8.4 | 3.9-8.4 | 4.3-8.5 |
| Total Protein Concentration  (g/dL) | Pretreatment | Mean (95% CI) | 7.22b (7.16-7.26) | 7.26c (7.23-7.29) | 7.36b,c (7.28-7.44) |
| SD | 0.423 | 0.431 | 0.418 |
| N | 282 | 716 | 117 |
| Median | 7.2 | 7.3 | 7.3 |
| Central 95% | 6.5-8.0 | 6.4-8.1 | 6.6-8.2 |
| Final | Mean (95% CI) | 6.95a (6.89-7.00) | 7.03a,c (6.99-7.06) | 6.95c (6.87-7.01) |
| SD | 0.461 | 0.473 | 0.396 |
| N | 282 | 732 | 117 |
| Median | 6.9 | 7.0 | 6.9 |
| Central 95% | 6.1-7.7 | 6.1-7.9 | 6.2-7.7 |
| Albumin Concentration  (g/dL) | Pretreatment | Mean (95% CI) | 4.38 (4.34-4.41) | 4.37 (4.34-4.39) | 4.44 (4.39-4.50) |
| SD | 0.286 | 0.294 | 0.297 |
| N | 282 | 723 | 117 |
| Median | 4.4 | 4.4 | 4.5 |
| Central 95% | 3.8-4.9 | 3.7-4.9 | 3.8-5.0 |
| Final | Mean (95% CI) | 4.21 (4.16-4.24) | 4.22 (4.19-4.24) | 4.20 (4.16-4.25) |
| SD | 0.351 | 0.327 | 0.257 |
| N | 282 | 736 | 117 |
| Median | 4.2 | 4.2 | 4.2 |
| Central 95% | 3.6-4.7 | 3.6-4.8 | 3.7-4.7 |
| Globulin Concentration  (g/dL) | Pretreatment | Mean (95% CI) | 2.90 (2.83-2.97) | 2.90 (2.87-2.93) | 2.90 (2.84-2.96) |
| SD | 0.294 | 0.334 | 0.330 |
| N | 58 | 444 | 112 |
| Median | 2.9 | 2.9 | 2.9 |
| Central 95% | 2.3-3.6 | 2.3-3.6 | 2.3-3.7 |
| Final | Mean (95% CI) | 2.78 (2.71-2.86) | 2.81 (2.78-2.85) | 2.74 (2.68-2.81) |
| SD | 0.260 | 0.364 | 0.346 |
| N | 47 | 439 | 110 |
| Median | 2.8 | 2.8 | 2.7 |
| Central 95% | 2.4-3.3 | 2.2-3.6 | 2.2-3.5 |
| Albumin/Globulin  (ratio) | Pretreatment | Mean (95% CI) | 1.52 (1.48-1.56) | 1.53 (1.51-1.55) | 1.56 (1.52-1.60) |
| SD | 0.168 | 0.209 | 0.219 |
| N | 58 | 444 | 112 |
| Median | 1.5 | 1.5 | 1.5 |
| Central 95% | 1.2-1.8 | 1.2-2.0 | 1.1-2.0 |
| Final | Mean (95% CI) | 1.54 (1.49-1.58) | 1.53 (1.50-1.55) | 1.56 (1.52-1.60) |
| SD | 0.165 | 0.237 | 0.221 |
| N | 47 | 439 | 110 |
| Median | 1.5 | 1.5 | 1.6 |
| Central 95% | 1.2-1.9 | 1.1-2.0 | 1.1-1.9 |
| Cholesterol Concentration  (mg/dL) | Pretreatment | Mean (95% CI) | 146.6 (143.1-150.3) | 144.5 (142.5-146.8) | 143.6 (139.5-147.9) |
| SD | 29.27 | 27.85 | 23.85 |
| N | 282 | 716 | 117 |
| Median | 144 | 142 | 143 |
| Central 95% | 97-208 | 93-201 | 103-202 |
| Final | Mean (95% CI) | 134.4 (131.5-137.8) | 136.2 (134.2-138.2) | 134.8 (131.0-138.8) |
| SD | 26.33 | 28.13 | 21.63 |
| N | 282 | 732 | 117 |
| Median | 131 | 133 | 134 |
| Central 95% | 88-193 | 87-200 | 95-186 |
| Triglyceride Concentration  (mg/dL) | Pretreatment | Mean (95% CI) | 49.1 (47.3-51.0) | 48.9 (47.7-50.3) | 49.1 (44.9-53.0) |
| SD | 15.65 | 17.44 | 22.53 |
| N | 276 | 716 | 117 |
| Median | 47 | 46 | 44 |
| Central 95% | 24-88 | 25-94 | 24-123 |
| Final | Mean (95% CI) | 48.3 (45.9-50.9) | 47.1 (45.6-48.6) | 45.6 (43.0-48.6) |
| SD | 20.71 | 21.26 | 16.23 |
| N | 276 | 732 | 117 |
| Median | 43 | 43 | 43 |
| Central 95% | 23-109 | 23-97 | 24-89 |
| * 95% CI generated via non-parametric bootstrap resampling, n = 1000  aCambodian-Chinese mean pairwise comparison statistically significant  bCambodian-Vietnamese mean pairwise comparison statistically significant  cChinese-Vietnamese mean pairwise comparison statistically significant | | | | | |
